# Supplementary material for: Effect of Composition on Polarization Hysteresis and Energy Storage Ability of P(VDF-TrFE-CFE) Relaxor Terpolymers
Source: MDPI journal article supplement (doi:10.3390/polym13081343), 2021-04-20
Supplement: s1 [file s1]

## Supplementary Materials

### Effect of composition on polarization hysteresis and energy storage ability of P(VDF-TrFE-CFE) relaxor terpolymers

Yusra Hambal<sup>1</sup>, Vladimir V. Shvartsman<sup>1\*</sup>, Daniil Lewin<sup>1</sup>, Chieng Huo Huat<sup>1</sup>, Xin Chen<sup>2</sup>, Ivo Michiels<sup>1</sup>, Qiming Zhang<sup>2</sup>, Doru C. Lupascu<sup>1</sup>

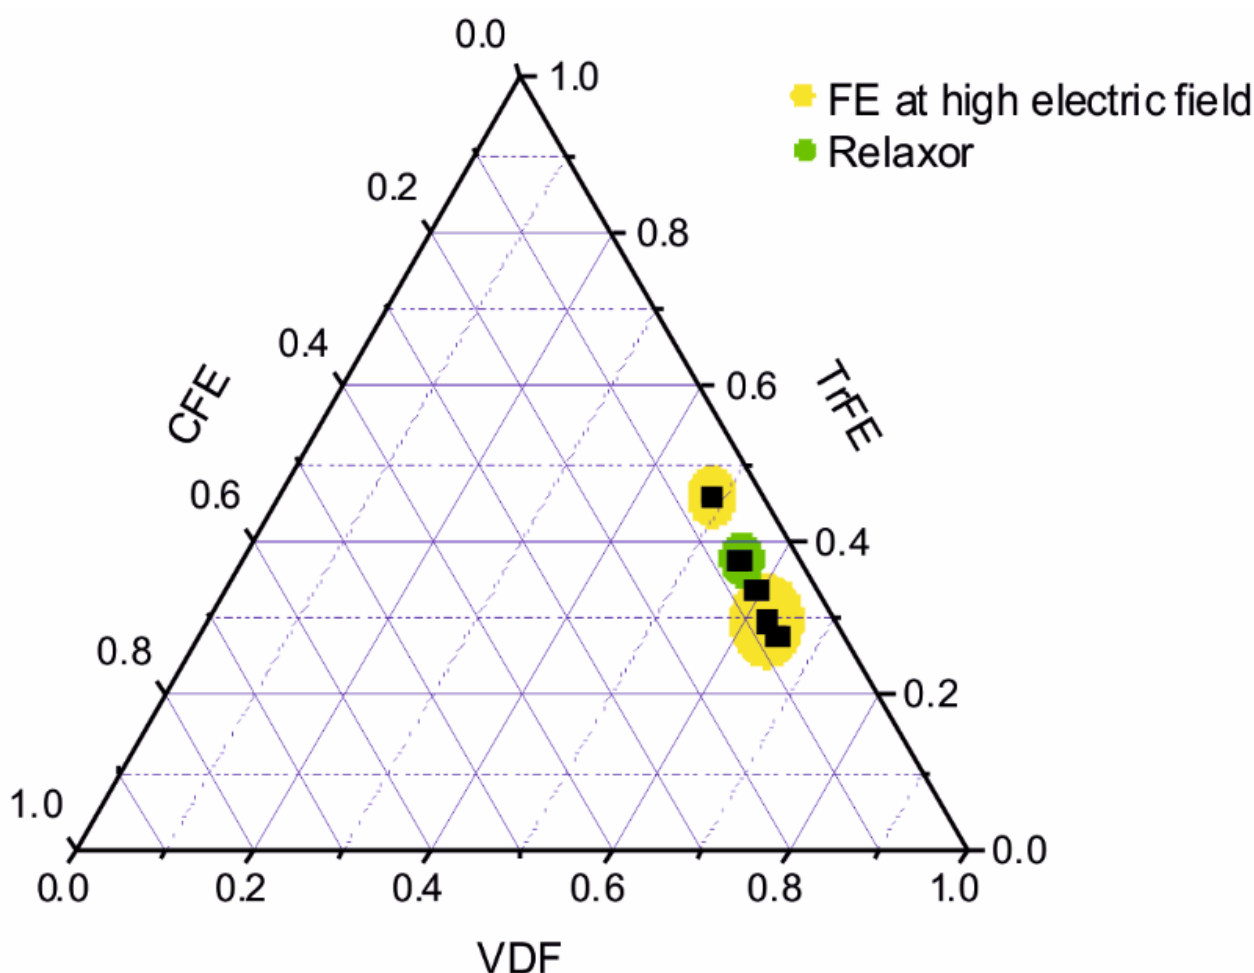

**Figure S1.** The ternary compositional diagram of P(VDF-TrFE-CFE) indicating the studied compositions.

17

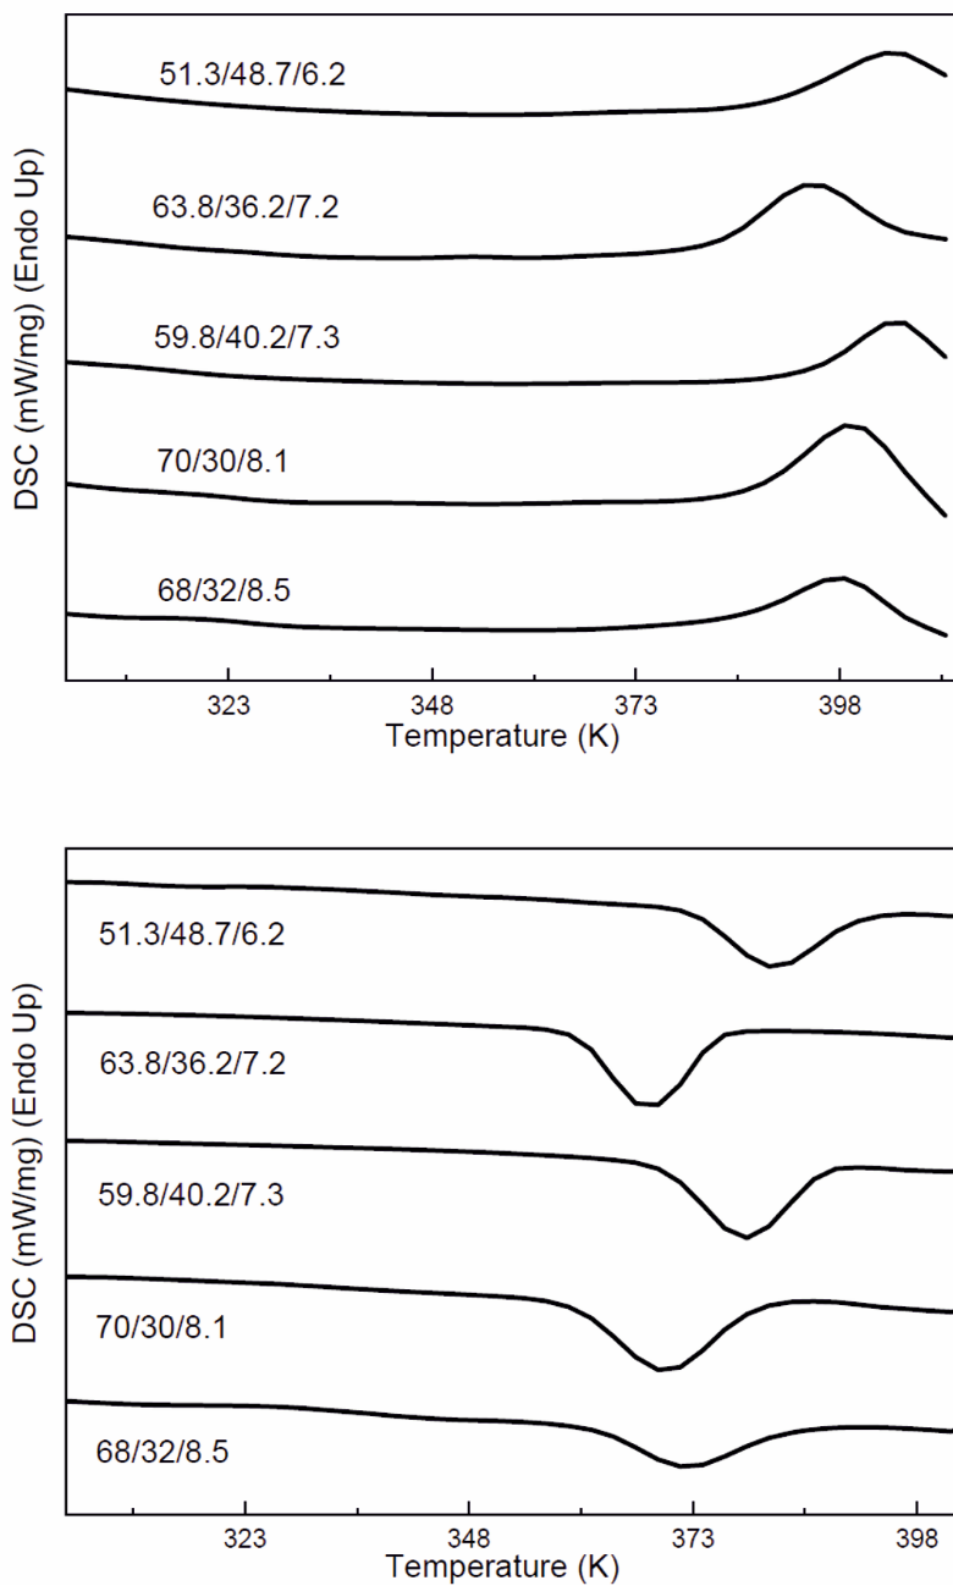

18

**Figure S2.** Heat flow curves of the P(VDF<sub>x</sub>-TrFE<sub>1-x</sub>-CFE<sub>y</sub>) polymer films measured by DSC upon heating (above) and cooling (below), where the peaks correspond to melting and recrystallization, respectively.

19

20

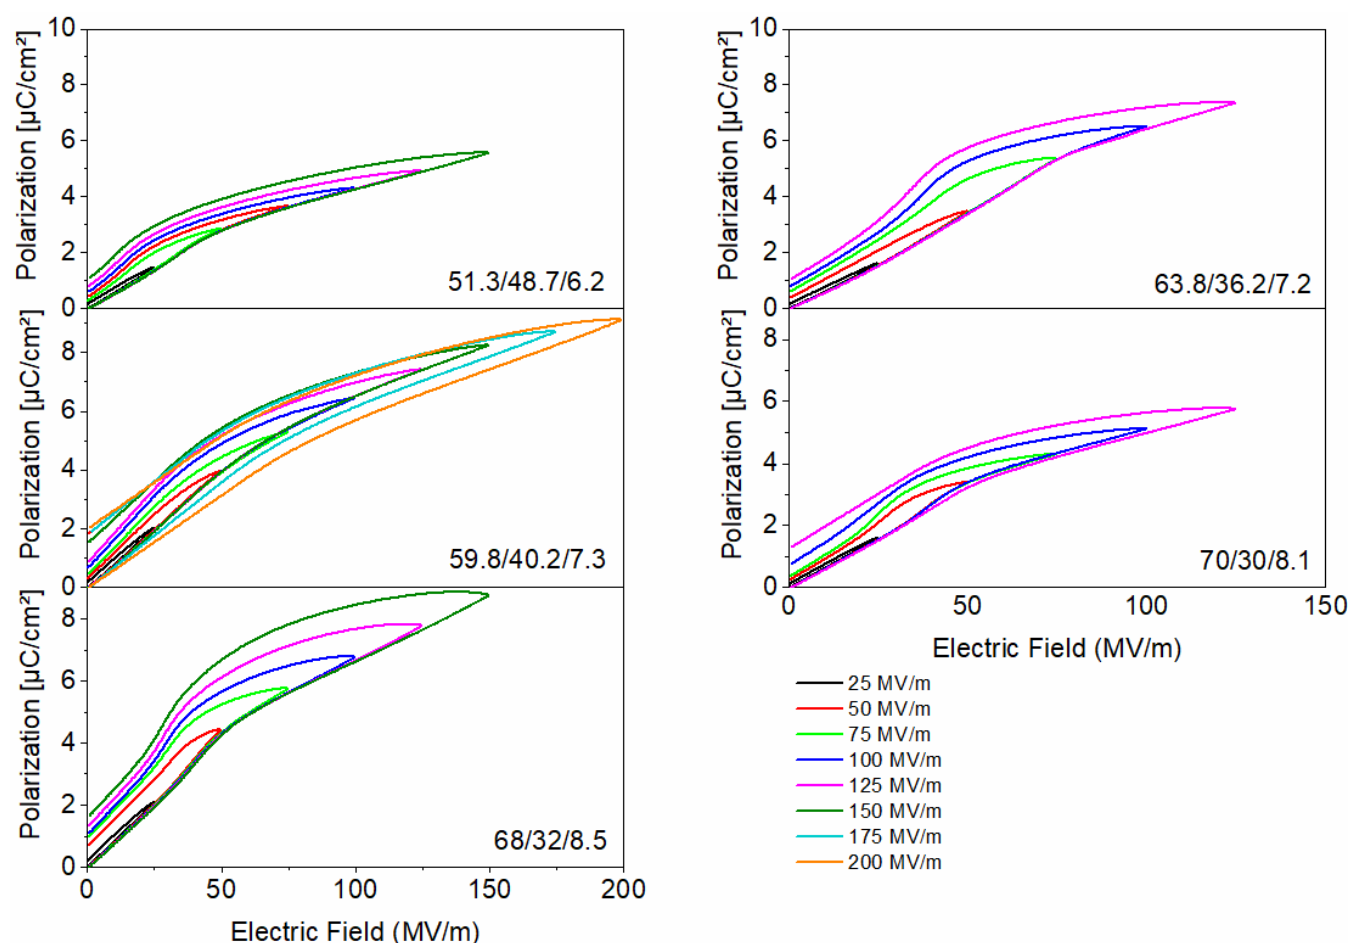

**Figure S3.** Unipolar polarization hysteresis curves of the  $P(VDF_x-TrFE_{1-x}-CFE_y)$  polymer films measured as a function of voltage at 10 Hz and room temperature.
